# Supplementary material for: A Well-Structured Follow-Up Program is Required after Recovery from Coronavirus Disease 2019 (COVID-19); Release from Quarantine is Not the End of Treatment
Source: MDPI journal article supplement (doi:10.3390/jcm10112329), 2021-05-26
Supplement: s1 [file s1]

**Table S1.** The characteristics of the subjects according to the physicians.

| Physician  | No. of assigned patients | No. of consultations | Age of assigned patients (years) | Sex of assigned patients (male) |
|------------|--------------------------|----------------------|----------------------------------|---------------------------------|
| #1         | 84                       | 1.37 ± 0.66          | 43.07 ± 16.81                    | 25 (29.8%)                      |
| #2         | 81                       | 1.41 ± 0.67          | 41.64 ± 16.02                    | 26 (32.1%)                      |
| #3         | 82                       | 1.66 ± 1.17          | 43.55 ± 16.74                    | 30 (36.6%)                      |
| #4         | 80                       | 1.44 ± 0.69          | 44.38 ± 17.10                    | 25 (31.3%)                      |
| #5         | 81                       | 1.44 ± 0.69          | 46.01 ± 16.03                    | 23 (28.4%)                      |
| #6         | 80                       | 1.39 ± 0.76          | 42.83 ± 16.17                    | 24 (30.0%)                      |
| #7         | 81                       | 1.31 ± 0.65          | 44.91 ± 15.34                    | 24 (29.6%)                      |
| #8         | 80                       | 1.31 ± 0.59          | 43.98 ± 15.87                    | 27 (33.8%)                      |
| #9         | 81                       | 1.37 ± 0.60          | 46.62 ± 17.17                    | 27 (33.3%)                      |
| #10        | 78                       | 1.33 ± 0.57          | 42.47 ± 16.73                    | 22 (28.2%)                      |
| #11        | 80                       | 1.46 ± 1.45          | 41.41 ± 15.27                    | 29 (36.3%)                      |
| #12        | 79                       | 1.37 ± 0.62          | 40.84 ± 15.74                    | 23 (29.1%)                      |
| #13        | 84                       | 1.26 ± 0.54          | 44.02 ± 15.94                    | 25 (29.8%)                      |
| #14        | 79                       | 1.30 ± 0.54          | 45.10 ± 16.84                    | 26 (32.9%)                      |
| #15        | 77                       | 1.36 ± 0.84          | 42.25 ± 16.80                    | 20 (26.0%)                      |
| #16        | 79                       | 1.27 ± 0.50          | 47.39 ± 16.35                    | 25 (31.6%)                      |
| #17        | 80                       | 1.34 ± 0.53          | 44.63 ± 13.115                   | 45 (56.3%)                      |
| #18        | 78                       | 1.51 ± 1.44          | 41.29 ± 17.25                    | 22 (28.2%)                      |
| #19        | 81                       | 1.42 ± 0.74          | 42.85 ± 16.55                    | 34 (42.0%)                      |
| #20        | 79                       | 1.33 ± 0.64          | 42.96 ± 18.07                    | 28 (35.4%)                      |
| <i>p</i> * |                          | 0.343                | 0.492                            | 0.052                           |

\*ANOVA for continuous variables, and Pearson's Chi-square test for discrete variables.
